# Supplementary material for: Rapid reversible changes in compartments and local chromatin organization revealed by hyperosmotic shock
Source: PubMed Central journal article supplement — Genome Res. 2019 Jan;29(1):18–28. doi: 10.1101/gr.238527.118 (PMC6314167; doi:10.1101/gr.238527.118), 2019-01
Supplement: supp_gr.238527.118_Supplemental_Fig_S1.pdf [file supp_gr.238527.118_Supplemental_Fig_S1.pdf]

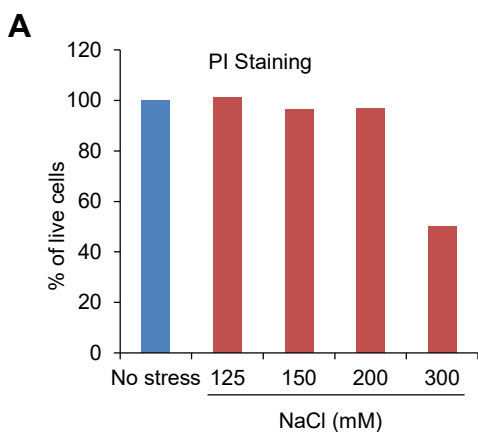

**B**

| SAMPLE_NAME                               | valid_contacts |
|-------------------------------------------|----------------|
| T47D no stress R1                         | 111908315      |
| T47D NaCl R1                              | 157717203      |
| T47D no stress R2                         | 186909882      |
| T47D NaCl R2                              | 202511615      |
| T47D No Stress (recovery set)             | 90884943       |
| T47D Triptolide (recovery set)            | 114726218      |
| T47D NaCl (recovery set)                  | 134532040      |
| T47D NaCl + Triptolide (recovery set)     | 119934380      |
| T47D Recovery (recovery set)              | 108435127      |
| T47D Recovery + Triptolide (recovery set) | 124734293      |

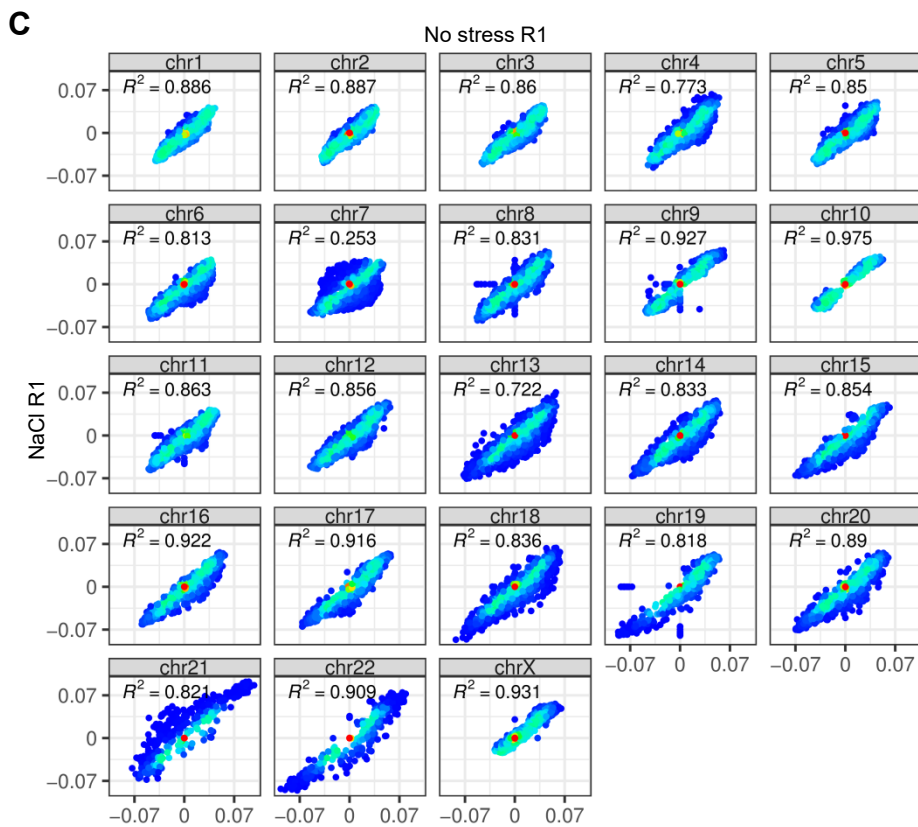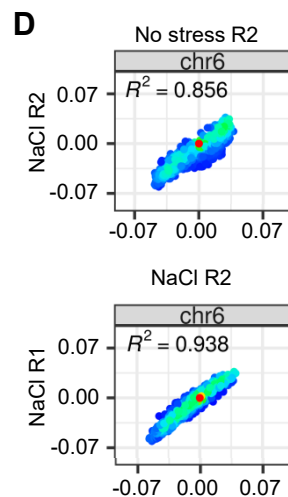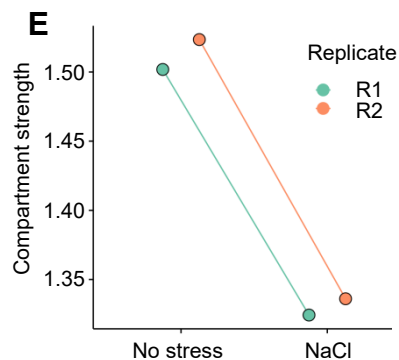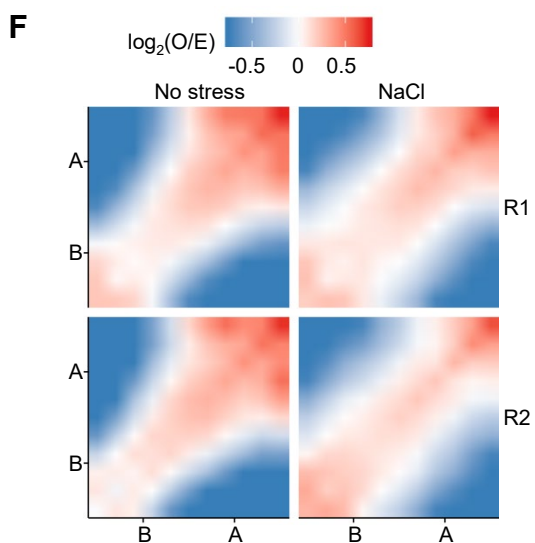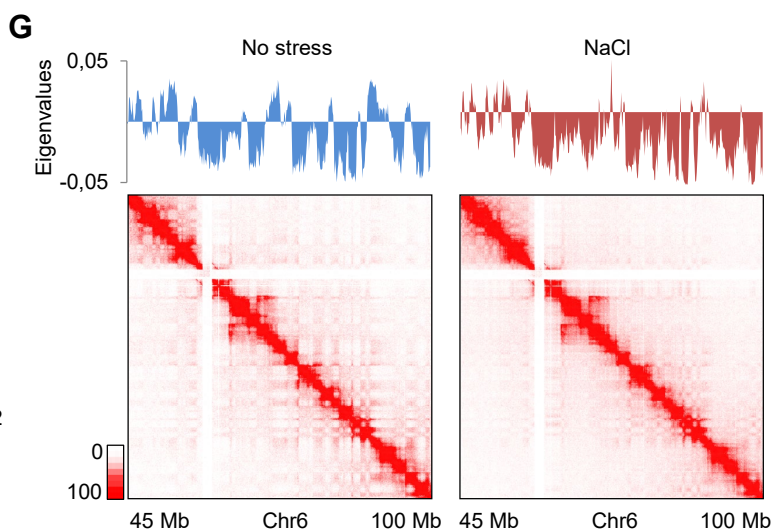

**Figure S1. Hyper-osmotic stress has a strong impact on A/B compartment organization.** The effect of osmotic stress was assayed using G0/1 arrested T47D cells as follows. A) Cell viability assays based on Propidium Iodide staining. The percentage of live cells is shown. B) Valid contacts obtained in the indicated HiC experiments. C) Correlation of eigenvalues for each individual chromosome obtained using HiC data, comparing non-stressed with NaCl-treated (110 mM for 60 min) cells. D) Correlation of eigenvalues obtained from HiC data, comparing the replicate samples of non-stressed with NaCl-treated cells, as well as comparing samples of NaCl-treated biological replicates. E) Compartment strength estimation with and without osmostress across replicates. F) Saddle plots showing the shift of interactions between compartments in control and stressed cells. Data are presented as the  $\log_2$  ratio of observed and expected aggregated contacts between bins of discretized eigenvalues (50 categories, bin size = 100 kb). G) Eigenvalues and HiC maps of non-stressed and NaCl-treated cells from a region of chromosome 6.
