# Supplementary material for: Rapid reversible changes in compartments and local chromatin organization revealed by hyperosmotic shock
Source: PubMed Central journal article supplement — Genome Res. 2019 Jan;29(1):18–28. doi: 10.1101/gr.238527.118 (PMC6314167; doi:10.1101/gr.238527.118), 2019-01
Supplement: supp_gr.238527.118_Supplemental_Fig_S2.pdf [file supp_gr.238527.118_Supplemental_Fig_S2.pdf]

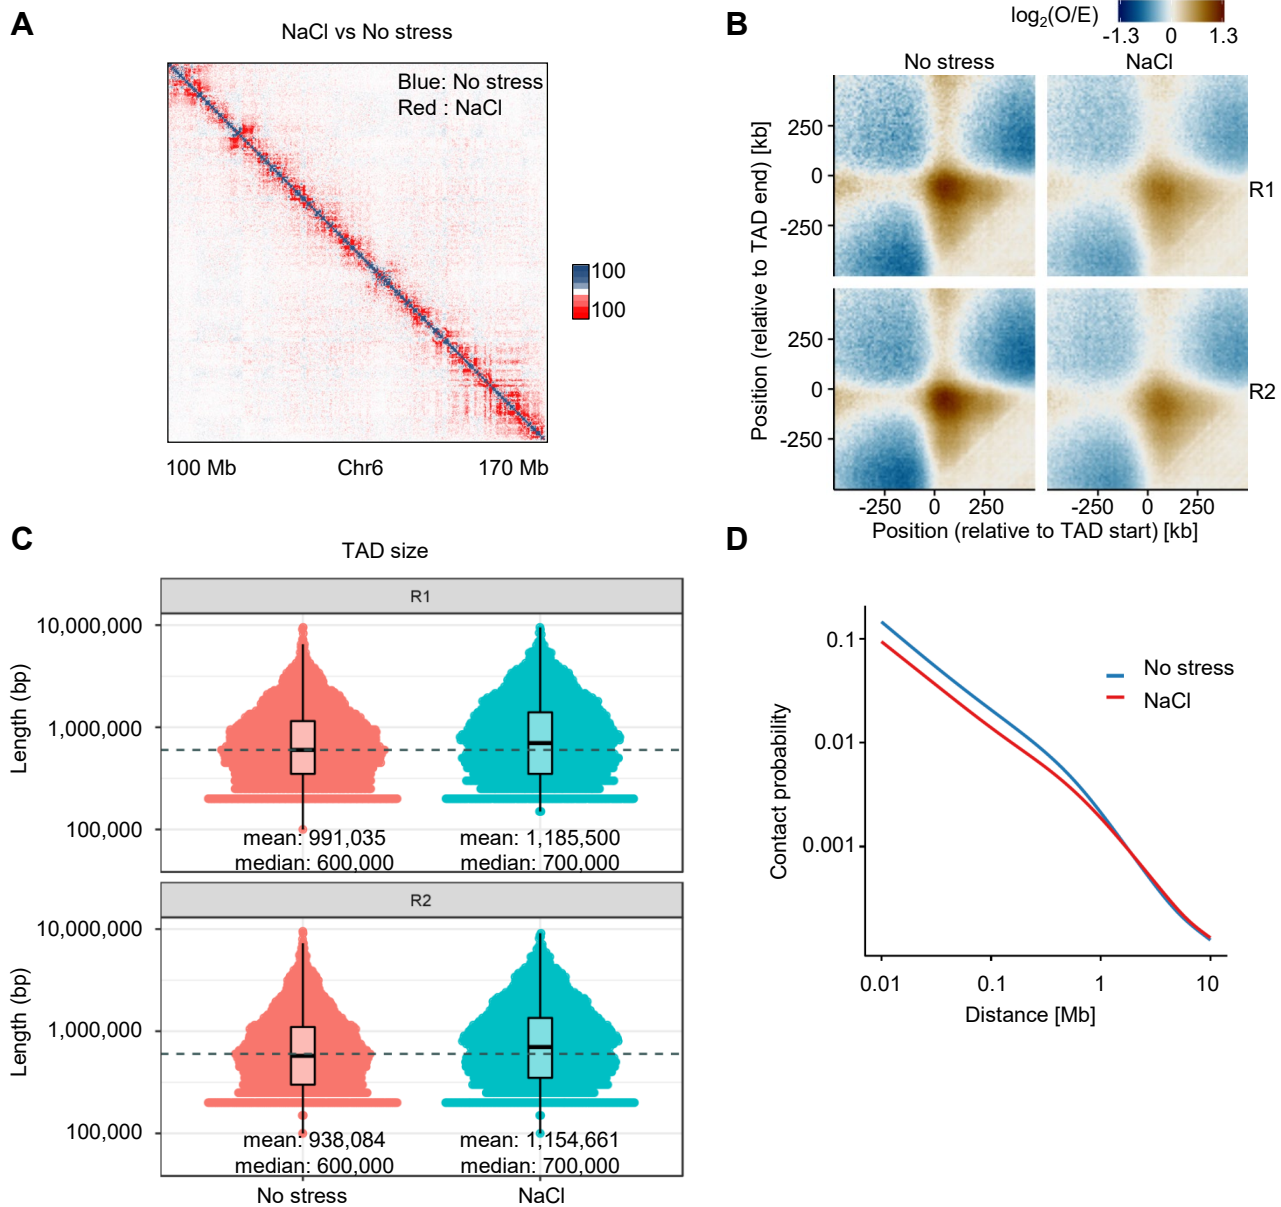

**Figure S2. Stress causes a decrease in the number of TADs and border insulation.**

A) A HiC interaction matrix obtained by subtraction of the signal of non-stressed from that of NaCl-treated sample contact maps in a region of chromosome 6 (blue, higher signal in control; red, higher signal in stressed cells.). B) Aggregated contact profiles centered on TAD borders representing the NaCl-induced loss of interactions between both ends of TADs across replicates. Data are presented as the  $\log_2$  ratio of observed and expected contacts in 10 kb bins. C) Violin plot of TAD size (nt) with and without stress. Dashed line indicates global median of TAD size. D) Contact probability *vs.* genomic distance, comparing no stress and NaCl treatment genome-wide.
