# Supplementary material for: Rapid reversible changes in compartments and local chromatin organization revealed by hyperosmotic shock
Source: PubMed Central journal article supplement — Genome Res. 2019 Jan;29(1):18–28. doi: 10.1101/gr.238527.118 (PMC6314167; doi:10.1101/gr.238527.118), 2019-01
Supplement: supp_gr.238527.118_Supplemental_Fig_S4.pdf [file supp_gr.238527.118_Supplemental_Fig_S4.pdf]

**A**

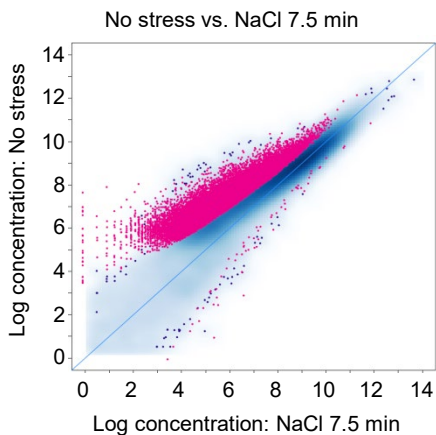

**B**

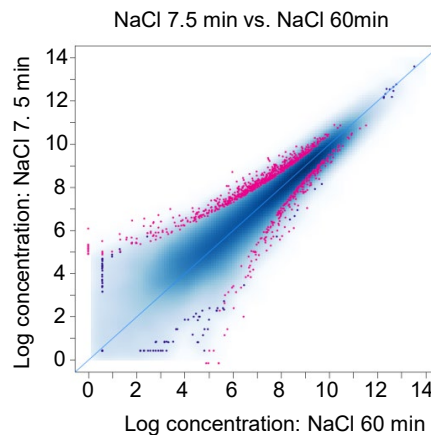

**C**

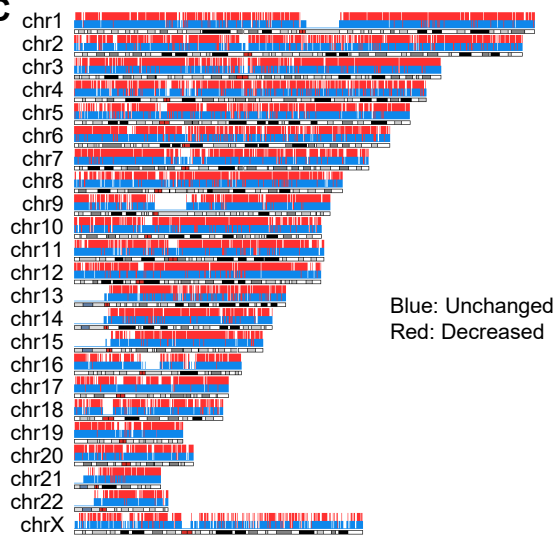

**D**

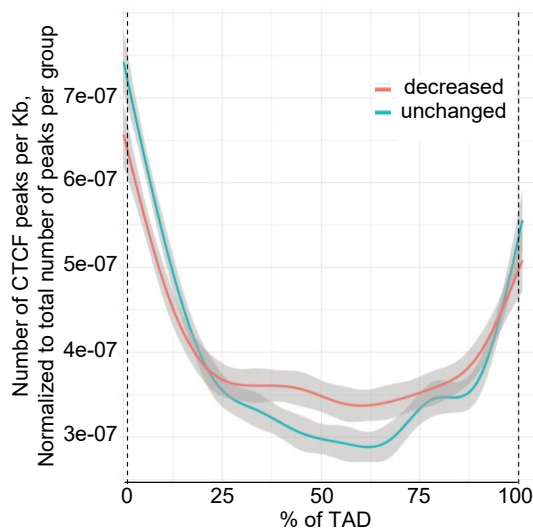

**E**

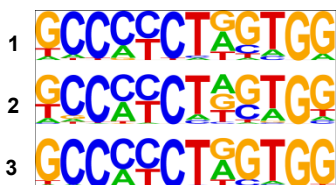

**G**

| 1 Co-occupancy CTCF sites |          | decreased | increased | unchanged           |
|---------------------------|----------|-----------|-----------|---------------------|
| decreased_vs_unchanged    |          | 4,54E-249 | 0,5025688 | 0.4825084-0.5234212 |
| increased_vs_unchanged    |          | 2,27E-112 | 3,9403509 | 3.4682874-4.4836796 |
|                           | RAD21    | 5258      | 866       | 9140                |
|                           | No RAD21 | 16853     | 354       | 14723               |

**F**

| CTCF motifs | Information content per bp | % target sequences with motif |
|-------------|----------------------------|-------------------------------|
| 1           | 1,731                      | 44,34%                        |
| 2           | 1,668                      | 49,20%                        |
| 3           | 1,784                      | 58,18%                        |

| 2 Co-occupancy CTCF sites  |  | decreased      | increased         | unchanged     |
|----------------------------|--|----------------|-------------------|---------------|
| ENCODE constitutive        |  | 3398           | 66                | 7504          |
| Not ENCODE constitutive    |  | 17515          | 224               | 18487         |
| <b>Fisher-test results</b> |  | <b>P-value</b> | <b>Odds-ratio</b> | <b>95% CI</b> |
| decreased vs. unchanged    |  | 1,50E-232      | 0,48              | 0.4566-0.5003 |
| increased vs. unchanged    |  | 2,24E-002      | 0,73              | 0.5423-0.9605 |

**H**

|                 | P-value | Odds-ratio            | 95% CI                |
|-----------------|---------|-----------------------|-----------------------|
|                 | 0       | 6,274386              | 5.772209-6.820943     |
|                 |         | <b>CTCF decreased</b> | <b>CTCF unchanged</b> |
| RAD21 decreased |         | 2459                  | 1121                  |
| RAD21 unchanged |         | 2816                  | 8055                  |

**Figure S4. Chromatin binding of architectural proteins is strongly affected by osmostress.** A and B) Scatterplots of global CTCF binding assessed using ChIP-seq, comparing control with 7.5 min NaCl-stressed (110 mM NaCl) cells (16394 peaks FDR<0.05), and 7.5 min NaCl- with 60 min NaCl-stressed cells (481 peaks FDR<0.05). Each dot corresponds to one peak. A red color indicates a significant change. C) Genome-wide distribution of CTCF sites showing no change (blue) or a significant signal decrease (red) due to NaCl treatment (110mM). D) Distribution of unchanged CTCF binding sites and of CTCF binding sites with a decreasing signal following osmostress throughout TAD bodies in % (normalized by size); dotted lines indicate adjacent borders. E) *De novo* motifs for CTCF binding sites identified by HOMER that show 1) decreased, 2) increased and 3) unchanged CTCF binding following osmostress. F) Information content of and percent of target sites with identified *de novo* motifs for CTCF groups shown in E). G) Contingency tables for the overlap of different classes of CTCF sites and 1) basal RAD21 peaks or 2) constitutive CTCF sites based on ENCODE data, as well as corresponding results for the indicated comparisons (Fisher's exact test; CI - confidence interval). H) Co-occupancy of RAD21 and CTCF depending on their respective behavior after hyper-osmotic shock (decreasing signal vs. unchanged signal), results of Fisher's exact test are presented as in G).
