# Supplementary material for: Rapid reversible changes in compartments and local chromatin organization revealed by hyperosmotic shock
Source: PubMed Central journal article supplement — Genome Res. 2019 Jan;29(1):18–28. doi: 10.1101/gr.238527.118 (PMC6314167; doi:10.1101/gr.238527.118), 2019-01
Supplement: supp_gr.238527.118_Supplemental_Fig_S5.pdf [file supp_gr.238527.118_Supplemental_Fig_S5.pdf]

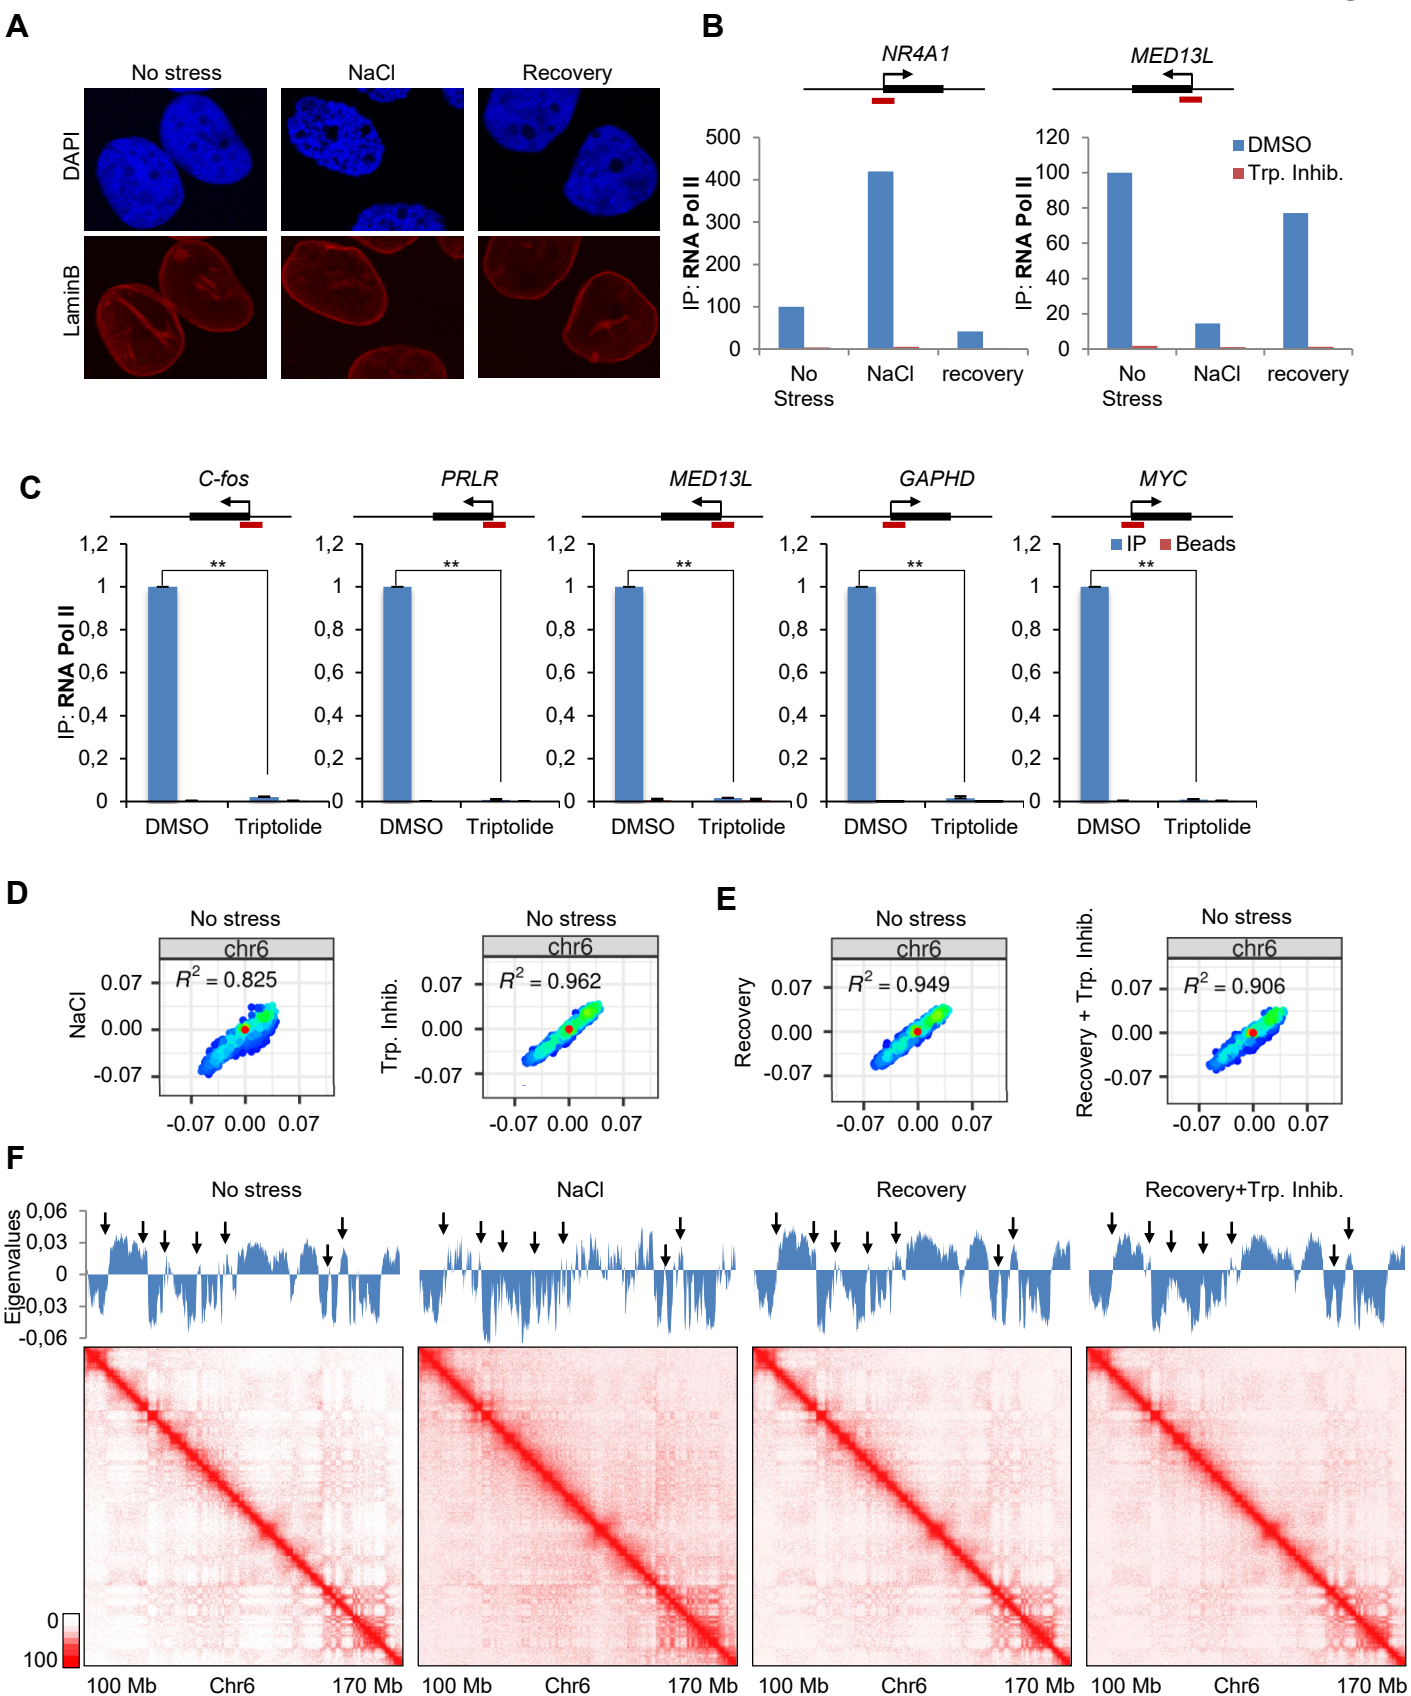

**Figure S5. Stress response is a dynamic reversible process.** A) Representative immunofluorescence images of no stress, 1h NaCl-treated or recovery (NaCl 60 min+ isotonic 60 min) conditions for Lamin B and stained with DAPI. B) Pol II ChIP results of no stress, 60 min NaCl-treated or recovery in the absence or presence of Transcription inhibitor (Triptolide 500 nM) at the TSS of *NR4A1* and *MED13L* analyzed using qPCR (red box indicates amplified region in the qPCR). C) Confirmation of transcription inhibition by 500 nM Triptolide by measuring Pol II occupancy at various TSS. D, E) Correlation of eigenvalues obtained from HiC data of the indicated chromosomes, comparing the indicated samples; No stress vs NaCl 60 min or the presence of the Triptolide (Trp. Inhib) as well as recovery or recovery in the presence of the Triptolide (500 nM) 2h prior treatment. F) HiC interaction matrices of a region of chromosome 6 spanning 100 Mb to 170 Mb under non-stressed, NaCl-stressed, recovery and recovery + transcription inhibitor (Triptolide 500 nM) conditions.
