# Supplementary material for: Rapid reversible changes in compartments and local chromatin organization revealed by hyperosmotic shock
Source: PubMed Central journal article supplement — Genome Res. 2019 Jan;29(1):18–28. doi: 10.1101/gr.238527.118 (PMC6314167; doi:10.1101/gr.238527.118), 2019-01
Supplement: supp_gr.238527.118_Supplemental_Fig_S6.pdf [file supp_gr.238527.118_Supplemental_Fig_S6.pdf]

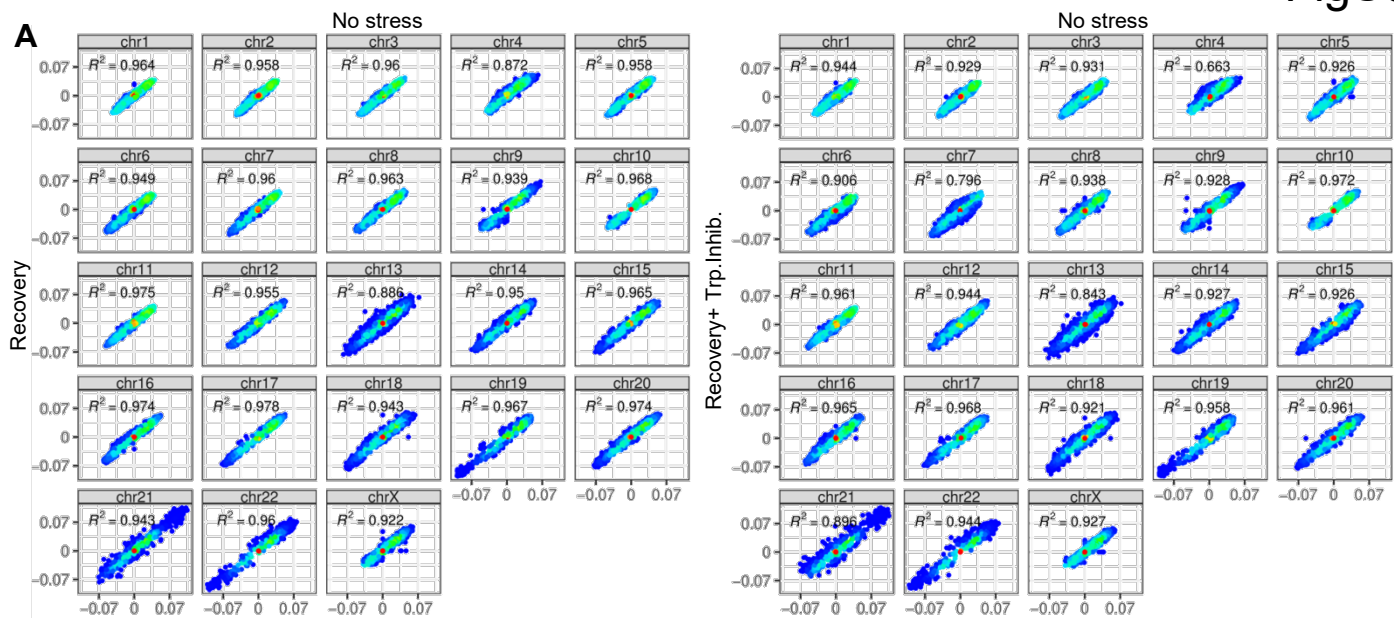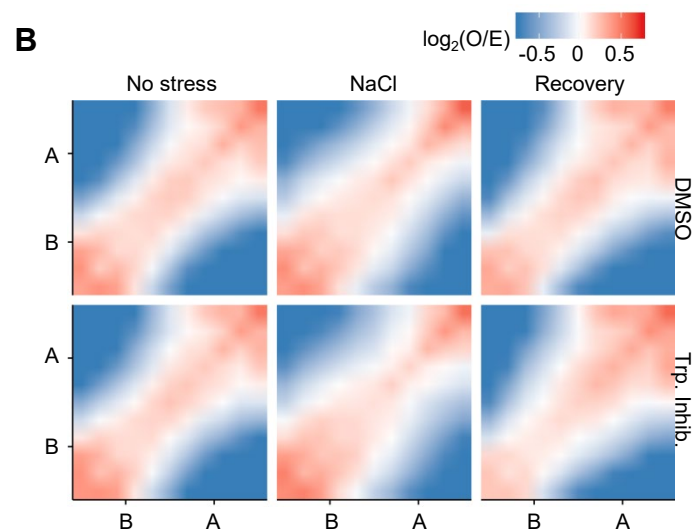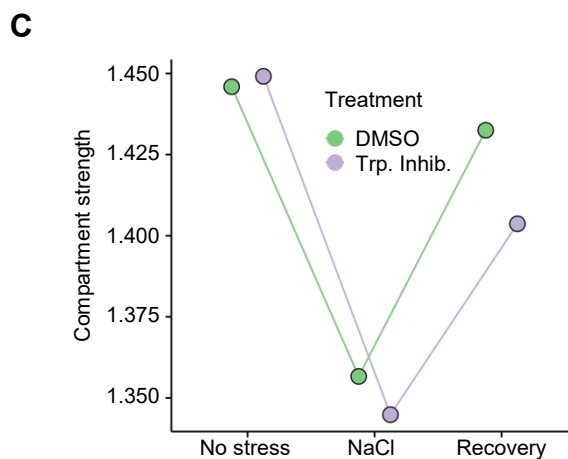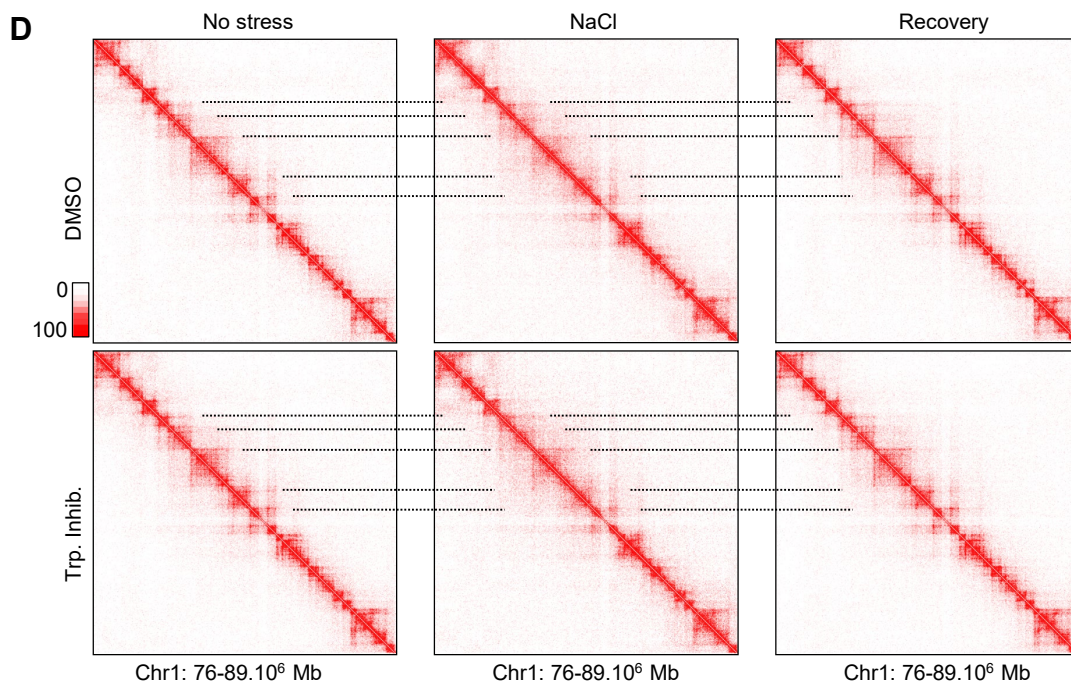

**Figure S6. The removal of stress leads to the re-establishment of genome structure.**

A) Correlation of eigenvalues for all chromosomes as previously shown in Figure S5C and S5D. B) Saddle plots showing the shift of interactions between compartments after osmostress and recovery, both with and without Triptolide (Trp. Inhib). Data are presented as the  $\log_2$  ratio of observed and expected aggregated contacts between bins of discretized eigenvalues (50 categories, bin size = 100 kb). C) Compartment strength estimation with and without Triptolide, before and after osmostress as well as after recovery. D) HiC interaction matrices of a region of chromosome 1 spanning 76 Mb to 89 Mb under non-stressed, NaCl-stressed (110 mM) and recovery conditions in the absence or presence of transcription inhibitor (Triptolide 500 nM).
