# Supplementary material for: Rapid reversible changes in compartments and local chromatin organization revealed by hyperosmotic shock
Source: PubMed Central journal article supplement — Genome Res. 2019 Jan;29(1):18–28. doi: 10.1101/gr.238527.118 (PMC6314167; doi:10.1101/gr.238527.118), 2019-01
Supplement: supp_gr.238527.118_Supplemental_Fig_S7.pdf [file supp_gr.238527.118_Supplemental_Fig_S7.pdf]

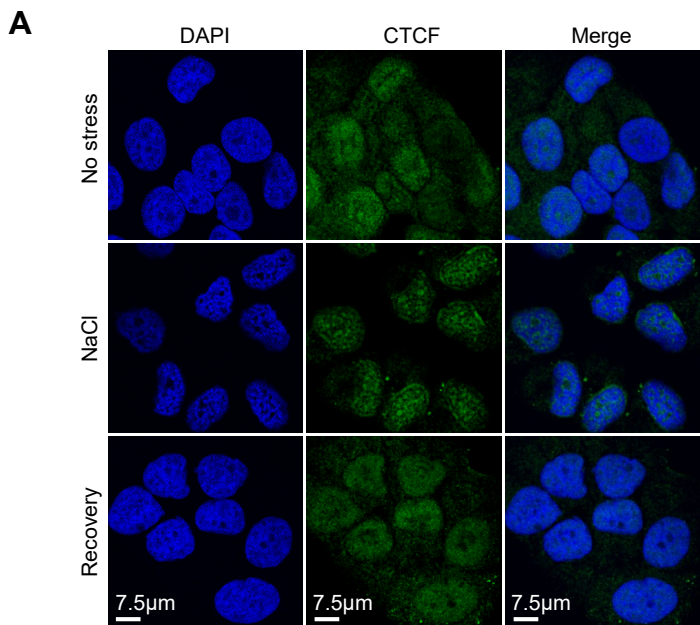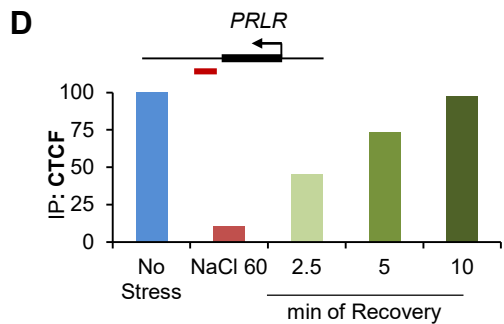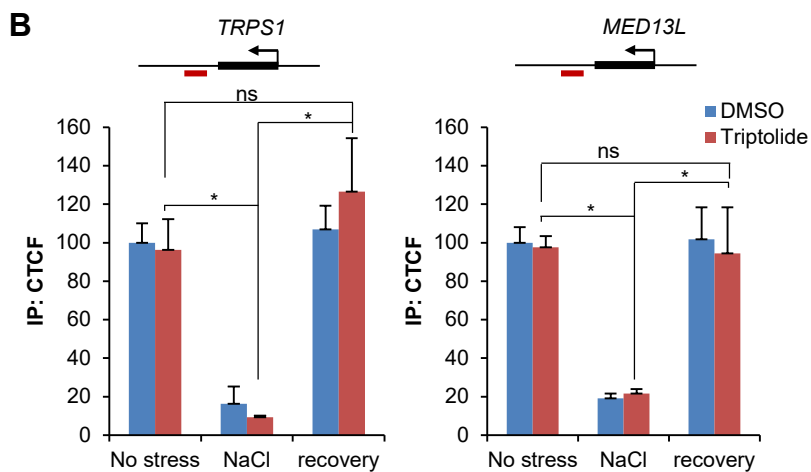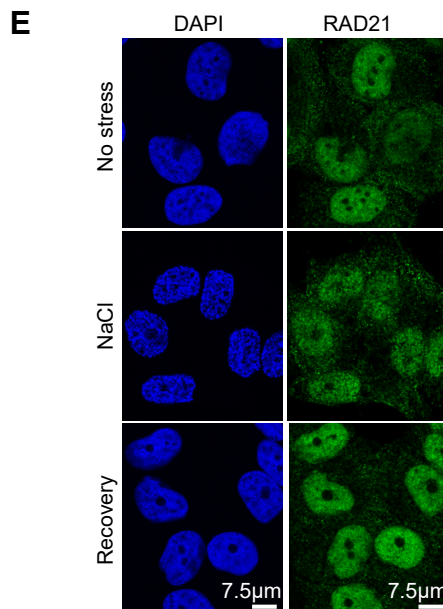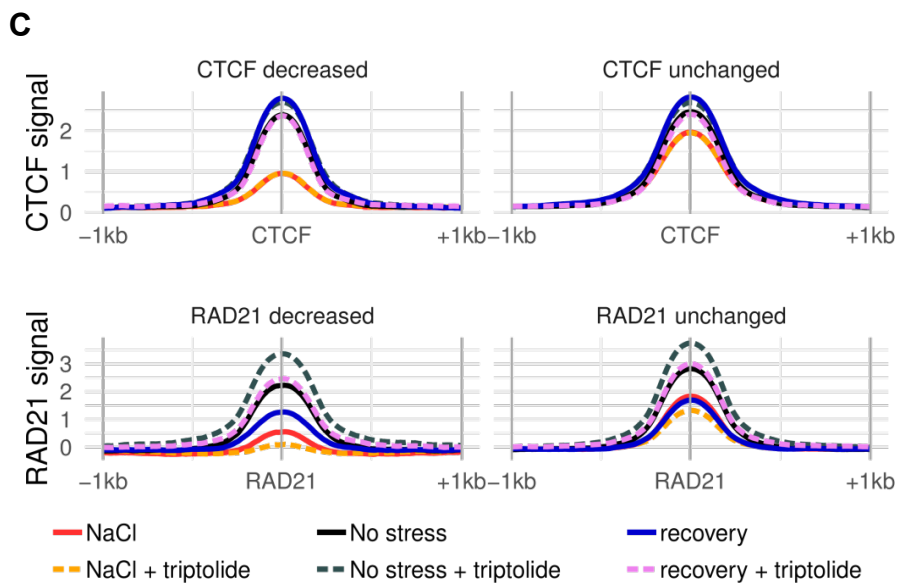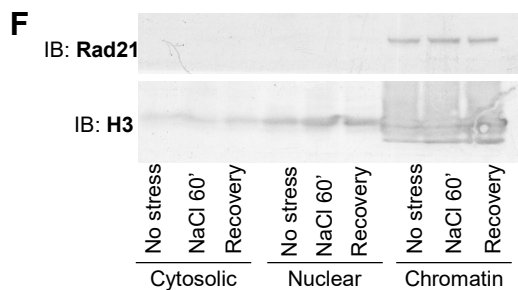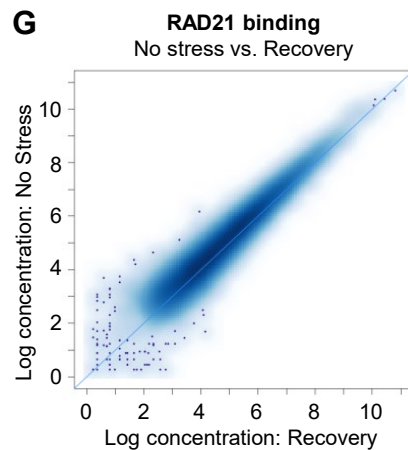

**Figure S7. Displacement and recovery of architectural proteins are largely independent of active transcription.** A) Representation of immunofluorescence images of no stress, 1h NaCl-treated or recovery (NaCl 60 min+ isotonic 60 min) conditions for CTCF staining with DAPI, or merge of both. B) CTCF quantification at the indicated binding sites, a red box indicates amplified region in the qPCR, as analyzed using qPCR in control, NaCl and recovery for indicated times. C) Average peak signal across various conditions for CTCF and RAD21 at identified CTCF and RAD21 peaks, respectively. Peak sets were stratified into “decreased” and “unchanged” based on their behavior in NaCl compared to no stress. D) CTCF quantification at the indicated binding site for different recovery times. E) Representative immunofluorescence images of no stress, 1 h NaCl-treated or recovery conditions for RAD21 and staining with DAPI. F) Immunoblot of RAD21 in cytosolic, nuclear and chromatin fraction of cells in control, NaCl and recovery conditions. G) Scatterplot of global RAD21 binding assessed using CHIP-seq, comparing control with recovery.
