# Supplementary material for: Rapid reversible changes in compartments and local chromatin organization revealed by hyperosmotic shock
Source: PubMed Central journal article supplement — Genome Res. 2019 Jan;29(1):18–28. doi: 10.1101/gr.238527.118 (PMC6314167; doi:10.1101/gr.238527.118), 2019-01
Supplement: supp_gr.238527.118_Supplemental_Fig_S8.pdf [file supp_gr.238527.118_Supplemental_Fig_S8.pdf]

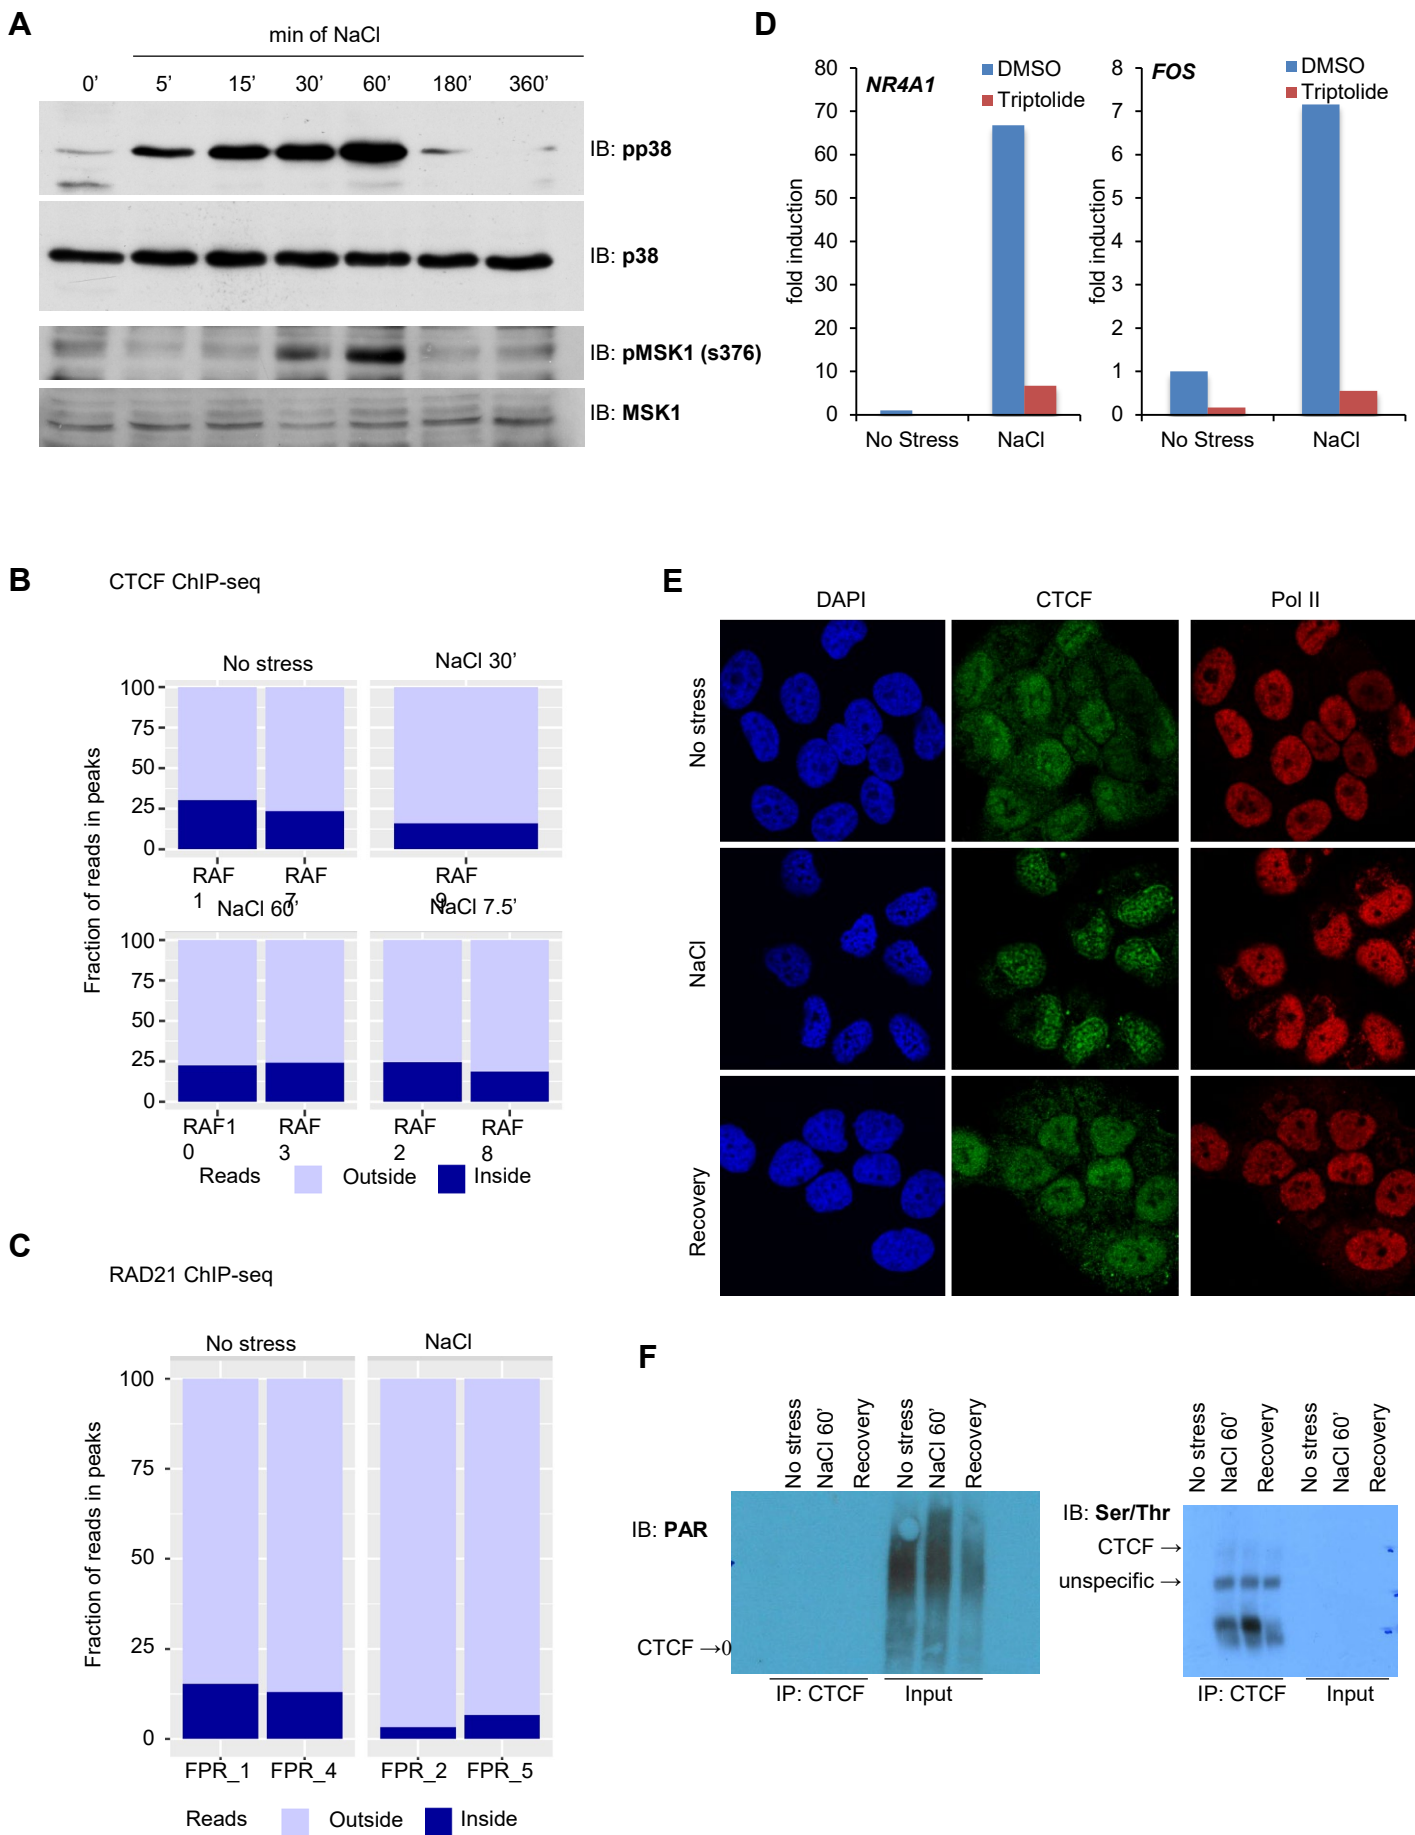

**Figure S8. Supplementary additional information.** A) Immunoblot of pp38, p38 MAPK, pMSK1 and MSK1 at indicated times after NaCl treatment. B) and C) Fraction of reads in peaks for CTCF (B) and RAD21 (C) samples with and without osmostress calculated by CHIPQC. Lower values indicate a worse signal-to-noise ratio. D) RNA expression levels of *NR4A1* and *FOS* in response to stress (60 min) in the absence or presence of transcription inhibitor (Triptolide 500 nM, for 2 hours before stress) analyzed by qPCR (SEM of N=2). E) Representation of immunofluorescence images of no stress, 1h NaCl-treated or recovery (NaCl 60 min+ isotonic 60 min) conditions for CTCF, RNA Pol II or DAPI. F) Immunoblot of PAR and Ser/Thr after immunoprecipitation with CTCF or corresponding inputs in no stress, NaCl or recovery conditions (NaCl 60 min+isotonic 60 min).
