# Supplementary material for: Rapid reversible changes in compartments and local chromatin organization revealed by hyperosmotic shock
Source: PubMed Central journal article supplement — Genome Res. 2019 Jan;29(1):18–28. doi: 10.1101/gr.238527.118 (PMC6314167; doi:10.1101/gr.238527.118), 2019-01
Supplement: supp_gr.238527.118_Supplemental_Table_Legends.pdf [file supp_gr.238527.118_Supplemental_Table_Legends.pdf]

### **Supplemental Table legends**

**Table S1.** DESeq2 output for the pair-wise comparison (NaCl vs. No stress) of each time point. Individual time points are stored in separate sheets.

**Table S2.** BED file of genomic coordinates for genes identified to exhibit Pol II run-off after 60' of hyperosmotic shock.
