# Supplementary material for: Rapid reversible changes in compartments and local chromatin organization revealed by hyperosmotic shock
Source: HighWire-hosted journal article supplement (doi:10.1101/gr.238527.118), 2018-12-06
Supplement: Supplemental_Table_S1.xlsx [file Supplemental_Table_S1.xlsx]

## Sheet: batch1+2
chromosome	no_stress_R1_VS_no_stress_R2	NaCl_R1_VS_NaCl_R2	no_stress_R1_VS_NaCl_R1	no_stress_R2_VS_NaCl_R2
chr1	0.976727	0.979	0.936658	0.941337
chr2	0.966052	0.966449	0.944532	0.943815
chr3	0.981022	0.978517	0.937033	0.937923
chr4	0.96232	0.144511	0.887997	0.122515
chr5	0.97808	0.973163	0.925087	0.927153
chr6	0.969067	0.969533	0.906738	0.928983
chr7	0.964794	0.978771	0.544947	0.560745
chr8	0.96435	0.950868	0.915736	0.914697
chr9	0.925302	0.975856	0.960369	0.903294
chr10	0.965568	0.980486	0.964089	0.967217
chr11	0.976268	0.968352	0.931104	0.945165
chr12	0.971631	0.978242	0.928286	0.927392
chr13	0.936644	0.94746	0.836869	0.863483
chr14	0.974332	0.963354	0.900399	0.904806
chr15	0.98146	0.985092	0.902408	0.904863
chr16	0.984419	0.985733	0.950823	0.953769
chr17	0.986678	0.989982	0.958257	0.959494
chr18	0.949485	0.965336	0.909661	0.91913
chr19	0.951896	0.950634	0.925131	0.944343
chr20	0.983595	0.984957	0.948543	0.948557
chr21	0.977689	0.973131	0.857144	0.85091
chr22	0.980794	0.979829	0.926223	0.937764
chrX	0.955938	0.971787	0.953349	0.931895

## Sheet: batch3
chromosome	no_stress_VS_no_stress_trp	no_stress_VS_NaCl	NaCl_VS_NaCl_trp	no_stress_VS_recovery	no_stress_VS_recovery_trp	recovery_VS_recovery_trp
chr1	0.974036	0.925553	0.97088	0.978889	0.967318	0.981577
chr2	0.966529	0.918682	0.970721	0.977014	0.960941	0.975726
chr3	0.98661	0.92747	0.980162	0.979067	0.964224	0.984005
chr4	0.951493	0.125108	0.884818	0.931235	0.798831	0.840153
chr5	0.978595	0.905931	0.972379	0.979983	0.96271	0.975159
chr6	0.975486	0.901923	0.973744	0.968858	0.94766	0.971976
chr7	0.979357	0.641152	0.98505	0.977476	0.865745	0.900065
chr8	0.979888	0.927791	0.975405	0.981507	0.968209	0.978056
chr9	0.898297	0.929498	0.979844	0.918709	0.911412	0.966928
chr10	0.974748	0.964022	0.977117	0.966512	0.970469	0.971793
chr11	0.98765	0.930925	0.983826	0.985527	0.978429	0.986645
chr12	0.983114	0.924116	0.982648	0.977117	0.971992	0.981253
chr13	0.947314	0.767444	0.950787	0.93178	0.906651	0.943034
chr14	0.972283	0.900634	0.977944	0.965418	0.948735	0.974651
chr15	0.976068	0.880608	0.970486	0.972614	0.944981	0.969924
chr16	0.981711	0.956349	0.981253	0.981798	0.975734	0.984569
chr17	0.973467	0.948098	0.981296	0.977308	0.969373	0.978169
chr18	0.971828	0.908531	0.977913	0.967775	0.957282	0.969393
chr19	0.919272	0.928955	0.966351	0.930675	0.919736	0.925888
chr20	0.984961	0.948021	0.986123	0.981071	0.974874	0.983974
chr21	0.935994	0.85808	0.962119	0.948862	0.9122	0.944007
chr22	0.957262	0.913128	0.972725	0.958426	0.952212	0.9653
chrX	0.950678	0.944435	0.974176	0.962428	0.964382	0.972151
